# Supplementary material
Source: PubMed Central journal article supplement (PMC2749133)

## ***SUPPLEMENTARY MATERIALS***

### **AMINO ACID POSITION-SPECIFIC CONTRIBUTIONS TO AMYLOID $\beta$ -PROTEIN OLIGOMERIZATION<sup>†</sup>**

**Samir K. Maji<sup>1,6</sup>, Rachel R. Ogorzalek Loo<sup>2,3</sup>, Mohammed Inayathullah<sup>1</sup>, Sean M. Spring<sup>1</sup>, Sabrina S. Vollers<sup>1,7</sup>, Margaret M. Condrón<sup>1</sup>, Gal Bitan<sup>1,3,4</sup>, Joseph A. Loo<sup>2,3,5</sup>, and David B. Teplow<sup>1,3,4,\*</sup>**

From <sup>1</sup>Department of Neurology and <sup>2</sup>Department of Biological Chemistry, David Geffen School of Medicine; <sup>3</sup>Molecular Biology Institute; <sup>4</sup>Brain Research Institute; and <sup>5</sup>Department of Chemistry and Biochemistry, University of California, Los Angeles, California 90095

**Running title:** Control of A $\beta$  oligomerization

<sup>6</sup>Current address: Laboratory of Physical Chemistry, ETH Zurich, CH-8093 Zurich, Switzerland

<sup>7</sup>Current address: Department of Biochemistry and Molecular Pharmacology, University of Massachusetts Medical School, Worcester, MA 01655

\*Address correspondence to: David B. Teplow, Ph.D., 635 Charles E. Young Drive South (Room 445), Los Angeles, CA 90095-7334; E-Mail: [dteplow@ucla.edu](mailto:dteplow@ucla.edu)

**Table S1. Electrophoretic migration of A $\beta$  oligomers<sup>a</sup>**

| <b>Band<sup>b</sup></b> | <b>[Y<sup>1</sup>]A<math>\beta</math>40</b> | <b>A<math>\beta</math>40</b> | <b>[Y<sup>20</sup>]A<math>\beta</math>40</b> | <b>[Y<sup>30</sup>]A<math>\beta</math>40</b> | <b>[Y<sup>40</sup>]A<math>\beta</math>40</b> | <b>[Y<sup>1</sup>]A<math>\beta</math>42</b> | <b>A<math>\beta</math>42</b> | <b>[Y<sup>20</sup>]A<math>\beta</math>42</b> | <b>[Y<sup>30</sup>]A<math>\beta</math>42</b> | <b>[Y<sup>42</sup>]A<math>\beta</math>42</b> |
|-------------------------|---------------------------------------------|------------------------------|----------------------------------------------|----------------------------------------------|----------------------------------------------|---------------------------------------------|------------------------------|----------------------------------------------|----------------------------------------------|----------------------------------------------|
| 1                       | 0.874                                       | 0.845                        | 0.847                                        | 0.848                                        | 0.852                                        | 0.851                                       | 0.841                        | 0.850                                        | 0.854                                        | 0.835                                        |
| 2                       | 0.746                                       | 0.703                        | 0.678                                        | 0.688                                        | 0.701                                        | 0.719                                       | 0.680                        | 0.654                                        | 0.654                                        | 0.667                                        |
| 3                       | 0.609                                       | 0.578                        | 0.517                                        | 0.556                                        | 0.563                                        | 0.538                                       | 0.545                        | 0.540                                        | 0.539                                        | 0.530                                        |
| 4                       | 0.563                                       | 0.460                        | 0.395                                        | 0.483                                        | 0.486                                        | 0.509                                       | 0.458                        | 0.43                                         | 0.426                                        | 0.424                                        |
| 5                       | 0.444                                       | 0.367                        | 0.305                                        | 0.395                                        | 0.451                                        | 0.413                                       | 0.364                        | 0.322                                        | 0.316                                        | 0.317                                        |
| 6                       | 0.344                                       | 0.318                        | 0.249                                        | 0.308                                        | 0.390                                        | 0.355                                       | 0.280                        | 0.224                                        | 0.209                                        | 0.217                                        |
| 7                       | 0.294                                       | –                            | –                                            | 0.230                                        | 0.304                                        | 0.216                                       | 0.216                        | 0.149                                        | 0.126                                        | 0.123                                        |
| 8                       | –                                           | –                            | –                                            | –                                            | 0.223                                        | 0.164                                       | –                            | –                                            | –                                            | –                                            |
| 9                       | –                                           | –                            | –                                            | –                                            | 0.159                                        | 0.123                                       | –                            | –                                            | –                                            | –                                            |

<sup>a</sup> $R_f$  values for the bands shown in Fig. 5 are listed. <sup>b</sup>Band numbers are referenced to the monomer band, which is #1, and increase in magnitude with decreasing  $R_f$  values.

## FIGURE LEGENDS

**Fig. S1.** Kinetic analysis of CD data. To obtain quantitative insight into the kinetics of the  $RC \rightarrow \alpha/\beta \rightarrow \beta$  conformational conversions monitored by CD, we plot the time-dependence of  $\theta_{222}$ . For systems that display significant population of  $\alpha$ -helix states,  $\theta_{222}$  is a useful estimator of  $\alpha$ -helix content. For systems that display rapid  $\alpha$ -helix  $\rightarrow$   $\beta$ -sheet conversions,  $\theta_{222}$  can be used as an estimator of overall conversion rate, but not  $\alpha$ -helix *per se*, because  $\theta_{222}$  is correlated with  $\theta_{215-218}$ , a measure of  $\beta$ -sheet content. (A) A $\beta$ 40. The half-time for the development of  $\alpha$ -helix structure is defined as the time at which  $\theta_{222}$  has a value equal to half the difference between its maximum and minimum values. The time at which maximal  $\alpha$ -helix structure occurs is defined by the point of inflection at the  $\theta_{222}$  minimum. (B) A $\beta$ 42. Conversions in this system occur at a rate approximately twice that of A $\beta$ 40. The kinetic analysis thus provides information on the sum of the rates of conversion from  $RC \rightarrow \alpha$  and  $\alpha \rightarrow \beta$ . No minimum is observed in the A $\beta$ 42 system. This is because CD is especially sensitive to  $\alpha$ -helix, which produces a greater absolute value of  $\theta$  than is seen with  $\beta$ -sheet. For the A $\beta$ 40 peptides, the  $\alpha$ -helix intermediates we have reported before (see Kirkitadze *et al.* (2001) *J. Mol. Biol.* 312:1103–1119) can accumulate because of the rate differences between its formation (causing  $\theta_{222}$  of greater magnitude) and its conversion to fibrils (causing  $\theta_{218}$  of greater magnitude, but less than that of  $\theta_{222}$ ). In contrast, for A $\beta$ 42, the maximum  $\alpha$ -helix content is low (versus A $\beta$ 40) and the  $\alpha/\beta \rightarrow \beta$  transition occurs rapidly, so that the increasing magnitude of the  $\theta_{218}$  compensates for the loss of the  $\theta_{222}$  signal and a minimum is not observed.  $\theta$  just keeps going down (more negative).

**Fig. S2.** Frequency distributions of particles examined by EM. Oligomer dimensions were determined by inspection of EM images with lens and graticule. A representative sample was obtained with particle number  $n=40$ . Distributions are shown for: (A), diameters of globular forms of un-cross-linked A $\beta$ 40; (B), diameters of globular forms of cross-linked A $\beta$ 40; (C), lengths of protofibrillar forms of A $\beta$ 40; (D), diameters of protofibrillar forms of A $\beta$ 40; (E), diameters of globular forms of [Tyr<sup>40</sup>]A $\beta$ 40; (F), lengths of protofibrillar forms of [Tyr<sup>40</sup>]A $\beta$ 40; and (G), diameters of globular forms of cross-linked [Tyr<sup>40</sup>]A $\beta$ 40.

Fig. S1A

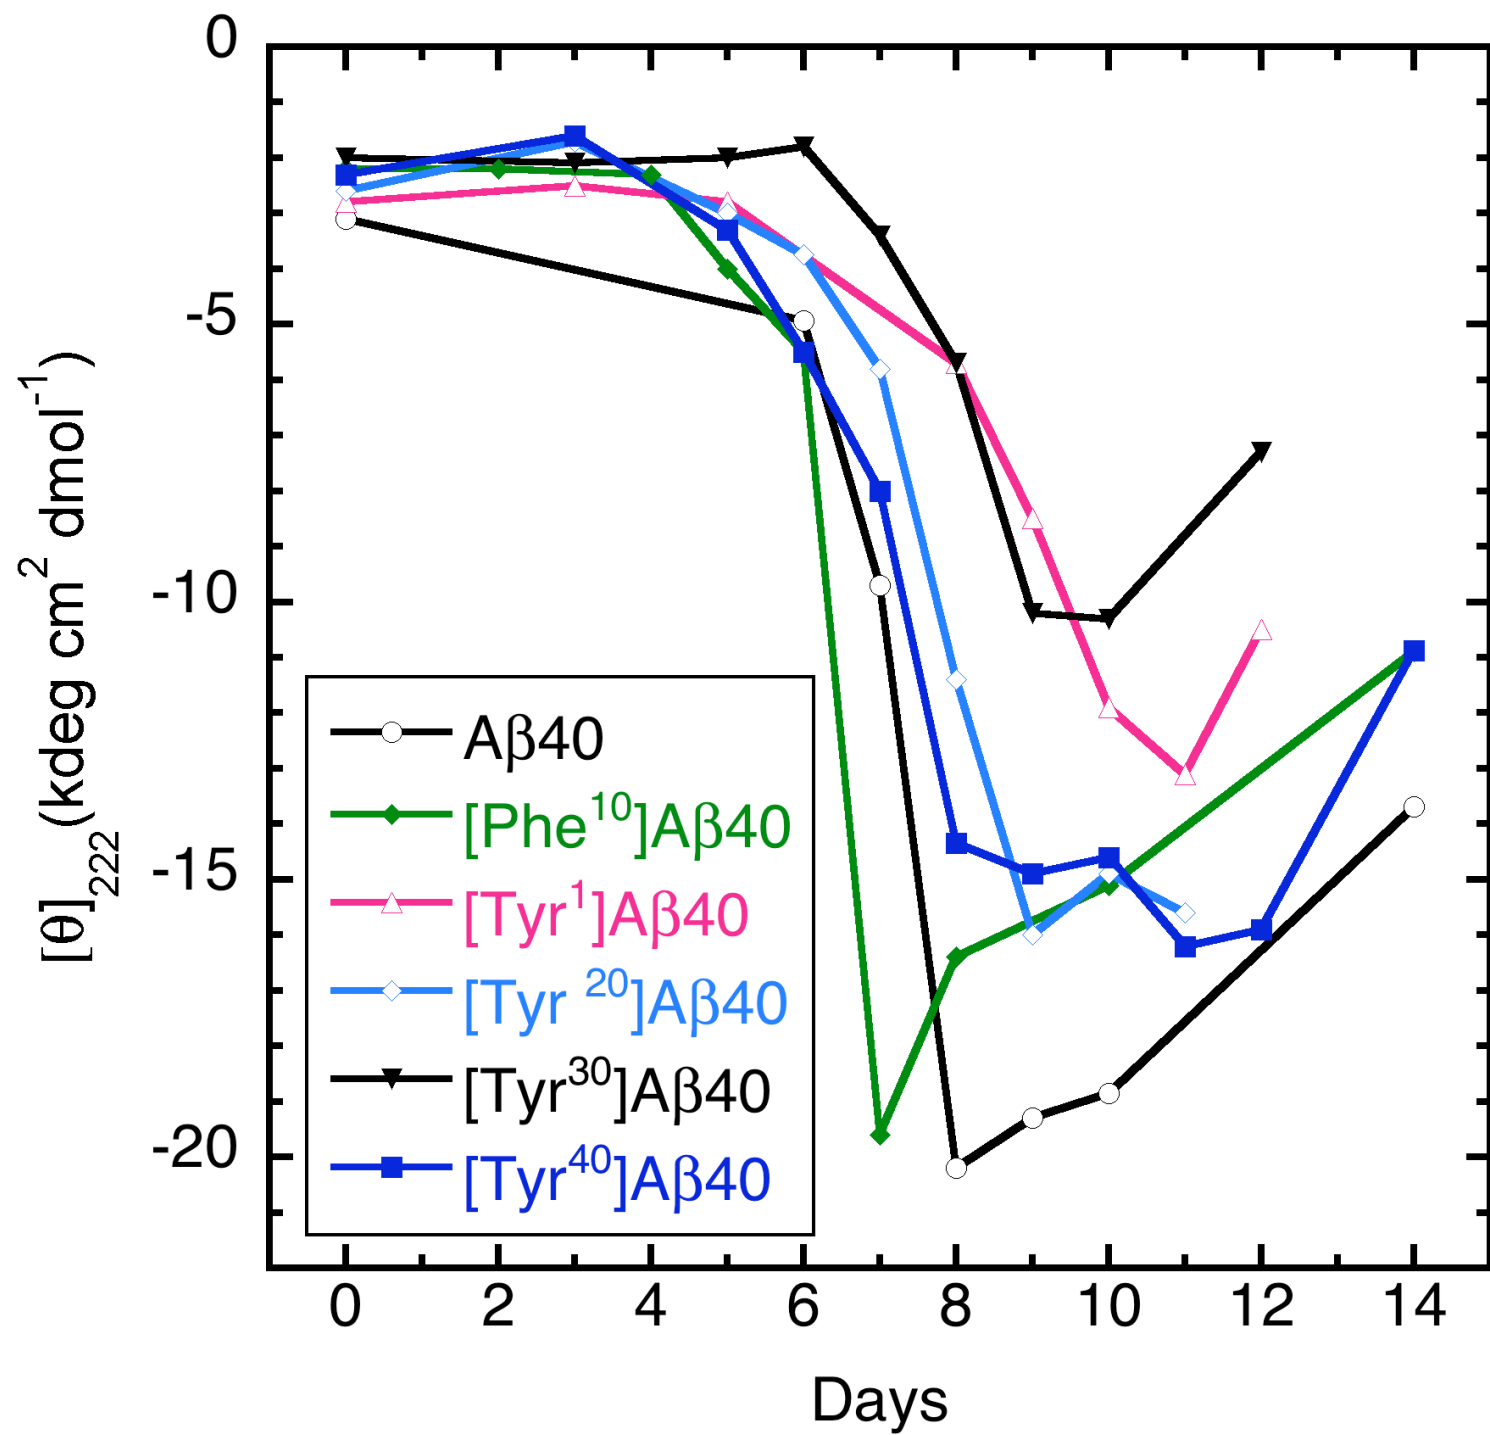

Fig. S1B

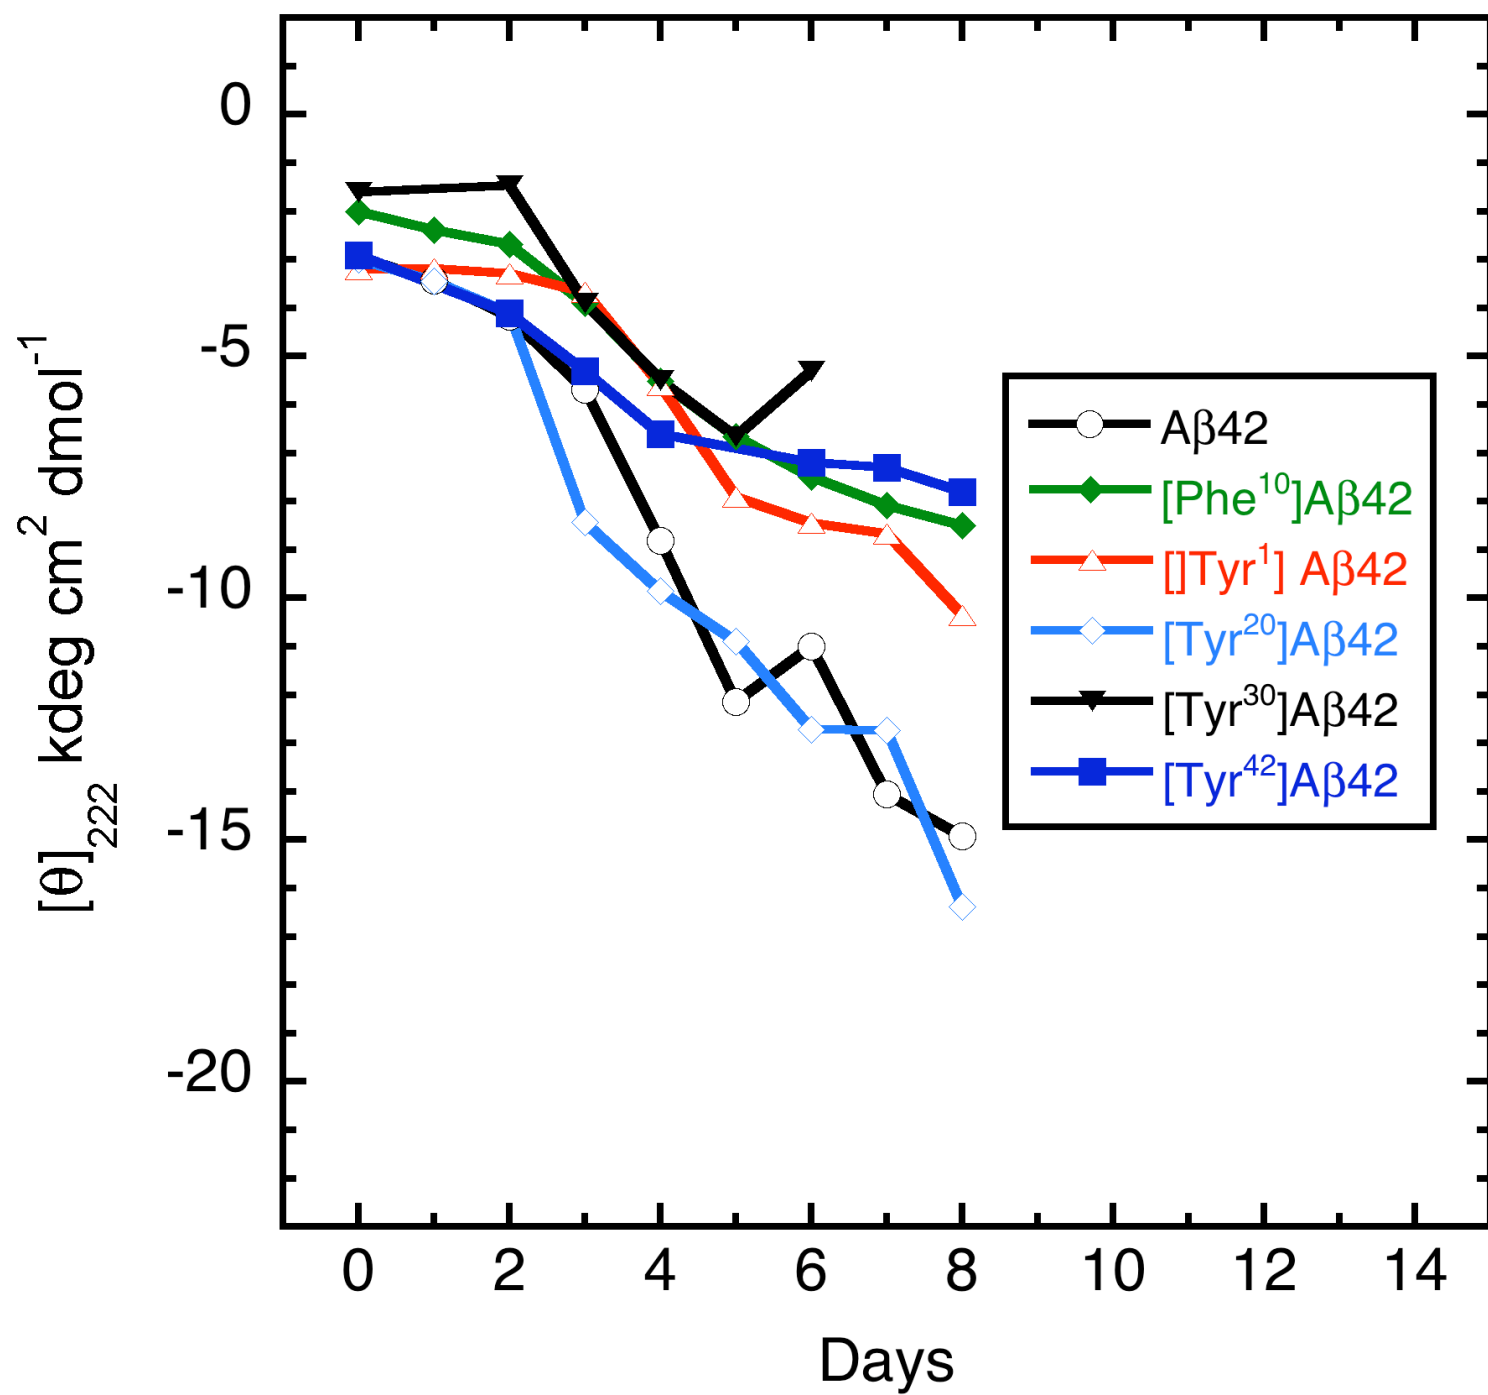

Fig. S2

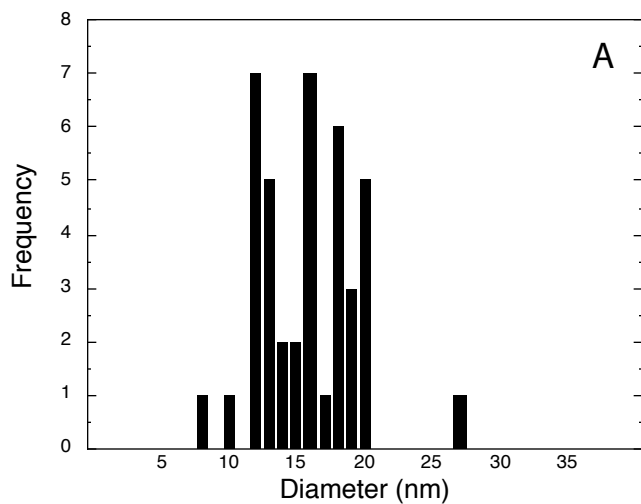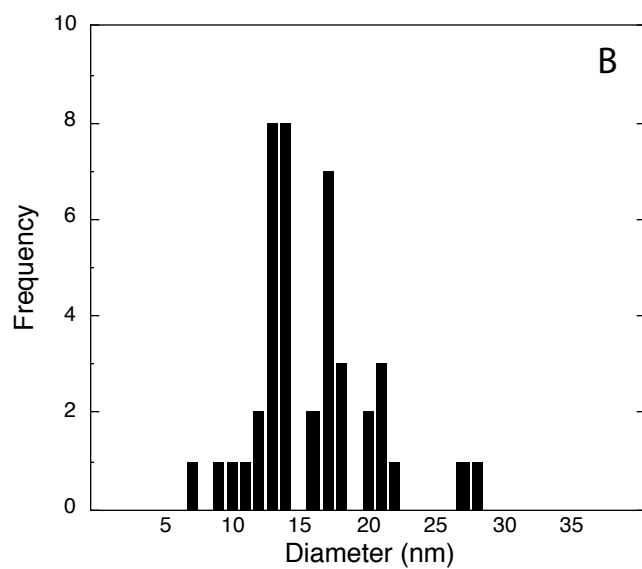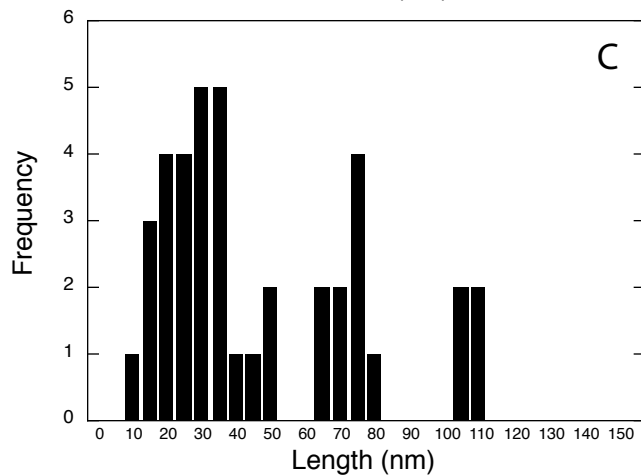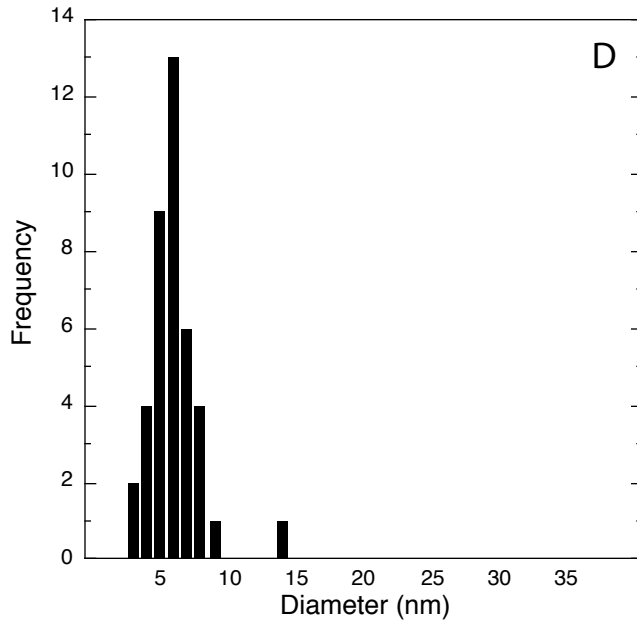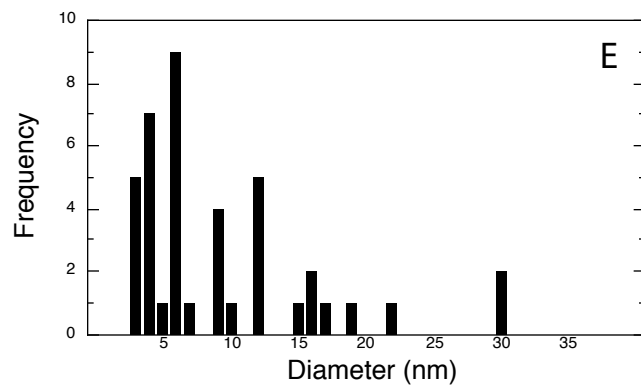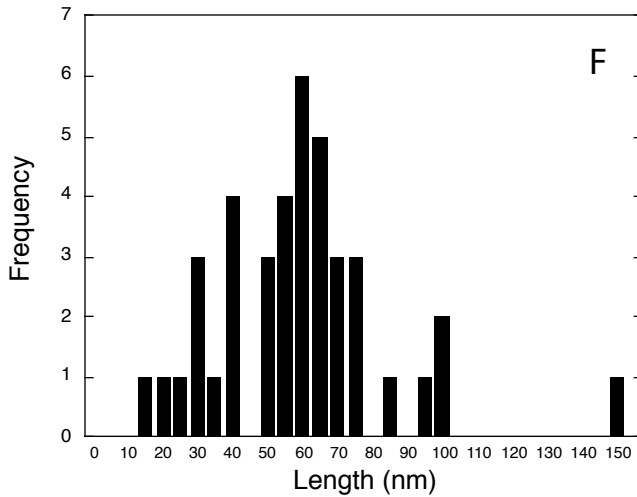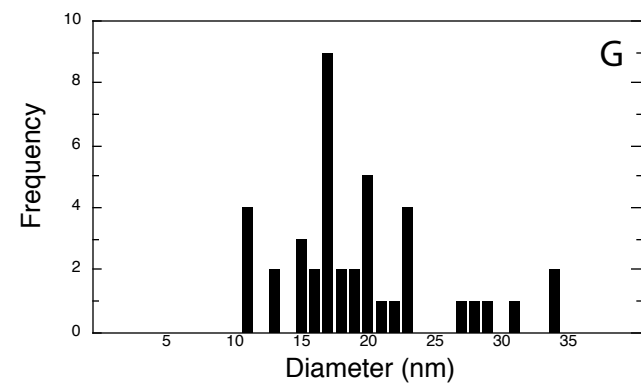

Supplement: supp_M109.038133_jbc.M109.038133-1.pdf [file supp_M109.038133_jbc.M109.038133-1.pdf]
